# Supplementary material for: Unidentifiable by morphology: DNA barcoding of plant material in local markets in Iran
Source: PLOS journal article supplement (doi:10.1371/journal.pone.0175722), 2017-04-18
Supplement: S5 (10.1371/journal.pone.0175722.s005) [file journal.pone.0175722.s005]

**S5 Table.** Optimized BLAST similarity identifications per sample. Identifications are assigned based on a combination of the identity score (High identity:  $i \geq 95\%$ ; Medium identity:  $90\% \leq i < 95\%$ ; Low identity:  $i < 90\%$ ) and the number of species within 1% deviation of the calculated similarity score.

| Sample | Marker | Identity | 1% top hits | Confidence                                                                                                  | Identification             |
|--------|--------|----------|-------------|-------------------------------------------------------------------------------------------------------------|----------------------------|
| Kh001  | ITS    | 96       | 5           | High identity ( $>95\%$ ). 1 species within 1% deviation of top hit. Species-level confidence.              | Cuminum cyminum            |
| Kh001  | trnL-F | 100      | 1           | High identity ( $>95\%$ ). 1 species within 1% deviation of top hit. Species-level confidence.              | Osmorhiza bipatriata       |
| Kh003  | ITS    | 99       | 3           | High identity ( $>95\%$ ). 3 species within 1% deviation of top hit. Genus-level confidence.                | Nepeta sp.                 |
| Kh003  | trnL-F | 99       | 1           | High identity ( $>95\%$ ). 1 species within 1% deviation of top hit. Species-level confidence.              | Nepeta racemosa            |
| Kh004  | ITS    | 91       | 2           | Medium identity ( $90\% \leq i < 95\%$ ). 2 species within 1% deviation of top hit. Genus-level confidence. | Satureja sp.               |
| Kh004  | trnL-F | 99       | 2           | High identity ( $>95\%$ ). 2 species within 1% deviation of top hit. Genus-level confidence.                | Satureja sp.               |
| Kh007  | ITS    | 92       | 1           | Medium identity ( $90\% \leq i < 95\%$ ). 1 species within 1% deviation of top hit. Genus-level confidence. | Echium sp.                 |
| Kh007  | trnL-F | 92       | 1           | Medium identity ( $90\% \leq i < 95\%$ ). 1 species within 1% deviation of top hit. Genus-level confidence. | Echium sp.                 |
| Kh008  | ITS    | 92       | 3           | Medium identity ( $90\% \leq i < 95\%$ ). 3 species within 1% deviation of top hit. Genus-level confidence. | Thymus sp.                 |
| Kh008  | trnL-F | 99       | 7           | High identity ( $>95\%$ ). 6 species within 1% deviation of top hit. Genus-level confidence.                | Thymus sp.                 |
| Kh009  | ITS    | 98       | 0           | High identity ( $>95\%$ ). Query coverage $< 70\%$ No identification.                                       | Unidentified               |
| Kh009  | trnL-F | 100      | 0           | High identity ( $>95\%$ ). Query coverage $< 70\%$ No identification.                                       | Unidentified               |
| Kh010  | trnL-F | 99       | 1           | High identity ( $>95\%$ ). 1 species within 1% deviation of top hit. Species-level confidence.              | Hymenocrater bituminosus   |
| Kh011  | ITS    | 94       | 1           | Medium identity ( $90\% \leq i < 95\%$ ). 1 species within 1% deviation of top hit. Genus-level confidence. | Anthemis sp.               |
| Kh011  | trnL-F | 99       | 2           | High identity ( $>95\%$ ). 2 species within 1% deviation of top hit. Genus-level confidence.                | Artemisia sp.              |
| Kh012  | ITS    | 95       | 1           | High identity ( $>95\%$ ). 1 species within 1% deviation of top hit. Species-level confidence.              | Althaea cannabina          |
| Kh016  | ITS    | 100      | 3           | High identity ( $>95\%$ ). 3 species within 1% deviation of top hit. Genus-level confidence.                | Thymus sp.                 |
| Kh016  | trnL-F | 99       | 7           | High identity ( $>95\%$ ). 7 species within 1% deviation of top hit. Genus-level confidence.                | Thymus sp.                 |
| Kh017  | ITS    | 98       | 2           | High identity ( $>95\%$ ). 2 species within 1% deviation of top hit. Genus-level confidence.                | Achillea sp.               |
| Kh017  | trnL-F | 99       | 16          | High identity ( $>95\%$ ). 14 species within 1% deviation of top hit. Genus-level confidence.               | Achillea sp.               |
| Kh018  | ITS    | 89       | 5           | Low identity ( $< 90\%$ ). 5 species within 1% deviation of top hit. Family-level confidence                | Lamiaceae                  |
| Kh018  | trnL-F | 98       | 5           | High identity ( $>95\%$ ). 5 species (2 genera) within 1% deviation of top hit. Family-level confidence     | Lamiaceae                  |
| Kh019  | trnL-F | 99       | 17          | High identity ( $>95\%$ ). 9 species within 1% deviation of top hit. Genus-level confidence.                | Teucrium sp.               |
| Kh020  | trnL-F | 100      | 17          | High identity ( $>95\%$ ). 15 species (2 genera) within 1% deviation of top hit. Family-level confidence    | Lamiaceae                  |
| Kh021  | ITS    | 100      | 1           | High identity ( $>95\%$ ). 1 species within 1% deviation of top hit. Species-level confidence.              | Althaea armeniaca          |
| Kh023  | trnL-F | 94       | 3           | Medium identity ( $90\% \leq i < 95\%$ ). 3 species within 1% deviation of top hit. Genus-level confidence. | Teucrium sp.               |
| Kh024  | ITS    | 100      | 3           | High identity ( $>95\%$ ). 3 species within 1% deviation of top hit. Genus-level confidence.                | Thymus sp.                 |
| Kh024  | trnL-F | 99       | 11          | High identity ( $>95\%$ ). 11 species within 1% deviation of top hit. Genus-level confidence.               | Thymus sp.                 |
| Kh025  | ITS    | 100      | 2           | High identity ( $>95\%$ ). 2 species within 1% deviation of top hit. Genus-level confidence.                | Carthamus sp.              |
| Kh028  | ITS    | 100      | 1           | High identity ( $>95\%$ ). 1 species within 1% deviation of top hit. Species-level confidence.              | Hypericum scabrum          |
| Kh028  | trnL-F | 97       | 0           | High identity ( $>95\%$ ). Query coverage $< 70\%$ No identification.                                       | Unidentified               |
| Kh031  | ITS    | 90       | 0           | Medium identity ( $90\% \leq i < 95\%$ ). Query coverage $< 70\%$ No identification.                        | Unidentified               |
| Kh031  | trnL-F | 100      | 2           | High identity ( $>95\%$ ). 1 species within 1% deviation of top hit. Species-level confidence.              | Physalis alkekengi         |
| Kh032  | trnL-F | 99       | 6           | High identity ( $>95\%$ ). 4 species within 1% deviation of top hit. Genus-level confidence.                | Ephedra sp.                |
| Kh033  | trnL-F | 99       | 0           | High identity ( $>95\%$ ). Query coverage $< 70\%$ No identification.                                       | Unidentified               |
| Kh034  | trnL-F | 100      | 2           | High identity ( $>95\%$ ). 2 species within 1% deviation of top hit. Genus-level confidence.                | Fraxinus sp.               |
| Kh036  | ITS    | 99       | 4           | High identity ( $>95\%$ ). 1 species within 1% deviation of top hit. Species-level confidence.              | Viola alba                 |
| Kh036  | trnL-F | 99       | 8           | High identity ( $>95\%$ ). 5 species within 1% deviation of top hit. Genus-level confidence.                | Viola sp.                  |
| Kh038  | ITS    | 100      | 1           | High identity ( $>95\%$ ). 1 species within 1% deviation of top hit. Species-level confidence.              | Cuminum cyminum            |
| Kh039  | ITS    | 89       | 2           | Low identity ( $< 90\%$ ). 2 species within 1% deviation of top hit. Family-level confidence                | Plantaginaceae             |
| Kh039  | trnL-F | 99       | 2           | High identity ( $>95\%$ ). 2 species within 1% deviation of top hit. Genus-level confidence.                | Plantago sp.               |
| Kh044  | ITS    | 99       | 4           | High identity ( $>95\%$ ). 3 species within 1% deviation of top hit. Genus-level confidence.                | Berberis sp.               |
| Kh045  | ITS    | 93       | 1           | Medium identity ( $90\% \leq i < 95\%$ ). 1 species within 1% deviation of top hit. Genus-level confidence. | Bunium sp.                 |
| Kh045  | trnL-F | 80       | 1           | Low identity ( $< 90\%$ ). 1 species within 1% deviation of top hit. Family-level confidence                | Apiaceae                   |
| Kh048  | ITS    | 98       | 1           | High identity ( $>95\%$ ). 1 species within 1% deviation of top hit. Species-level confidence.              | Zosima absinthifolia       |
| Kh048  | trnL-F | 99       | 1           | High identity ( $>95\%$ ). 1 species within 1% deviation of top hit. Species-level confidence.              | Zosima absinthifolia       |
| Kh051  | trnL-F | 98       | 1           | High identity ( $>95\%$ ). 1 species within 1% deviation of top hit. Species-level confidence.              | Hymenocrater bituminosus   |
| Kh053  | ITS    | 84       | 1           | Low identity ( $< 90\%$ ). 1 species within 1% deviation of top hit. Family-level confidence                | Lamiaceae                  |
| Kh053  | trnL-F | 100      | 1           | High identity ( $>95\%$ ). 1 species within 1% deviation of top hit. Species-level confidence.              | Mentha arvensis            |
| Kh055  | trnL-F | 97       | 1           | High identity ( $>95\%$ ). 1 species within 1% deviation of top hit. Species-level confidence.              | Nepeta menthoides          |
| Kh056  | ITS    | 98       | 1           | High identity ( $>95\%$ ). 1 species within 1% deviation of top hit. Species-level confidence.              | Allium atroviolaceum       |
| Kh056  | trnL-F | 98       | 5           | High identity ( $>95\%$ ). 5 species within 1% deviation of top hit. Genus-level confidence.                | Allium sp.                 |
| Kh057  | ITS    | 100      | 3           | High identity ( $>95\%$ ). 3 species within 1% deviation of top hit. Genus-level confidence.                | Thymus sp.                 |
| Kh057  | trnL-F | 76       | 7           | Low identity ( $< 90\%$ ). 7 species within 1% deviation of top hit. Family-level confidence                | Lamiaceae                  |
| Kh058  | ITS    | 99       | 2           | High identity ( $>95\%$ ). 2 species within 1% deviation of top hit. Genus-level confidence.                | Achillea sp.               |
| Kh058  | trnL-F | 99       | 33          | High identity ( $>95\%$ ). 32 species within 1% deviation of top hit. Genus-level confidence.               | Achillea sp.               |
| Kh059  | ITS    | 95       | 1           | High identity ( $>95\%$ ). 1 species within 1% deviation of top hit. Species-level confidence.              | Alcea acaulis              |
| Kh062  | trnL-F | 99       | 6           | High identity ( $>95\%$ ). 4 species within 1% deviation of top hit. Genus-level confidence.                | Mentha sp.                 |
| Kh063  | ITS    | 97       | 1           | High identity ( $>95\%$ ). 1 species within 1% deviation of top hit. Species-level confidence.              | Tanacetum turcomanicum     |
| Kh063  | trnL-F | 98       | 1           | High identity ( $>95\%$ ). 1 species within 1% deviation of top hit. Species-level confidence.              | Artemisia lagocephala      |
| Kh065  | trnL-F | 99       | 11          | High identity ( $>95\%$ ). 11 species within 1% deviation of top hit. Genus-level confidence.               | Thymus sp.                 |
| Kh066  | trnL-F | 99       | 17          | High identity ( $>95\%$ ). 10 species within 1% deviation of top hit. Genus-level confidence.               | Teucrium sp.               |
| Kh067  | trnL-F | 99       | 2           | High identity ( $>95\%$ ). 2 species within 1% deviation of top hit. Family-level confidence                | Lamiaceae                  |
| Kh068  | ITS    | 99       | 13          | High identity ( $>95\%$ ). 13 species within 1% deviation of top hit. Genus-level confidence.               | Alcea sp.                  |
| Kh069  | ITS    | 100      | 3           | High identity ( $>95\%$ ). 3 species within 1% deviation of top hit. Genus-level confidence.                | Thymus sp.                 |
| Kh069  | trnL-F | 99       | 11          | High identity ( $>95\%$ ). 11 species within 1% deviation of top hit. Genus-level confidence.               | Thymus sp.                 |
| Kh070  | ITS    | 99       | 1           | High identity ( $>95\%$ ). 1 species within 1% deviation of top hit. Species-level confidence.              | Satureja hortensis         |
| Kh070  | trnL-F | 99       | 1           | High identity ( $>95\%$ ). 1 species within 1% deviation of top hit. Species-level confidence.              | Satureja hortensis         |
| Kh071  | ITS    | 95       | 1           | High identity ( $>95\%$ ). 1 species within 1% deviation of top hit. Species-level confidence.              | Bunium capillifolium       |
| Kh071  | trnL-F | 97       | 4           | High identity ( $>95\%$ ). 4 species within 1% deviation of top hit. Family-level confidence                | Apiaceae                   |
| Kh073  | trnL-F | 97       | 3           | High identity ( $>95\%$ ). 1 species within 1% deviation of top hit. Species-level confidence.              | Teucrium polium            |
| Kh074  | ITS    | 90       | 0           | Medium identity ( $90\% \leq i < 95\%$ ). Query coverage $< 70\%$ No identification.                        | Unidentified               |
| Kh074  | trnL-F | 99       | 1           | High identity ( $>95\%$ ). 1 species within 1% deviation of top hit. Species-level confidence.              | Perovskia abrotanoides     |
| Kh075  | trnL-F | 99       | 30          | High identity ( $>95\%$ ). 25 species (2 genera) within 1% deviation of top hit. Family-level confidence    | Lamiaceae                  |
| Kh076  | ITS    | 96       | 1           | High identity ( $>95\%$ ). 1 species within 1% deviation of top hit. Species-level confidence.              | Tripleurospermum maritimum |
| Kh076  | trnL-F | 97       | 2           | High identity ( $>95\%$ ). 2 species within 1% deviation of top hit. Genus-level confidence.                | Artemisia sp.              |
| Kh082  | trnL-F | 99       | 1           | High identity ( $>95\%$ ). 1 species within 1% deviation of top hit. Species-level confidence.              | Hymenocrater bituminosus   |
| Kh090  | ITS    | 96       | 4           | High identity ( $>95\%$ ). 4 species within 1% deviation of top hit. Genus-level confidence.                | Satureja sp.               |
| Kh090  | trnL-F | 99       | 3           | High identity ( $>95\%$ ). 3 species within 1% deviation of top hit. Genus-level confidence.                | Satureja sp.               |
| Kh095  | ITS    | 97       | 3           | High identity ( $>95\%$ ). 3 species within 1% deviation of top hit. Genus-level confidence.                | Tanacetum sp.              |
| Kh095  | trnL-F | 98       | 1           | High identity ( $>95\%$ ). 1 species within 1% deviation of top hit. Species-level confidence.              | Artemisia lagocephala      |
| Kh102  | ITS    | 99       | 1           | High identity ( $>95\%$ ). 1 species within 1% deviation of top hit. Species-level confidence.              | Papaver bracteatum         |
| Kh102  | trnL-F | 95       | 2           | High identity ( $>95\%$ ). 2 species within 1% deviation of top hit. Genus-level confidence.                | Papaver sp.                |
| Kh108  | trnL-F | 99       | 16          | High identity ( $>95\%$ ). 10 species within 1% deviation of top hit. Genus-level confidence.               | Teucrium sp.               |
| Kh110  | trnL-F | 99       | 1           | High identity ( $>95\%$ ). 1 species within 1% deviation of top hit. Species-level confidence.              | Achillea wilhelmsii        |
| Kh111  | ITS    | 99       | 12          | High identity ( $>95\%$ ). 6 species within 1% deviation of top hit. Genus-level confidence.                | Amaranthus sp.             |
| Kh111  | trnL-F | 94       | 2           | Medium identity ( $90\% \leq i < 95\%$ ). 2 species within 1% deviation of top hit. Genus-level confidence. | Amaranthus sp.             |
| Kh112  | trnL-F | 100      | 17          | High identity ( $>95\%$ ). 17 species (2 genera) within 1% deviation of top hit. Family-level confidence    | Lamiaceae                  |
| Kh113  | ITS    | 94       | 6           | Medium identity ( $90\% \leq i < 95\%$ ). 4 species within 1% deviation of top hit. Genus-level confidence. | Echium sp.                 |
| Kh113  | trnL-F | 99       | 1           | High identity ( $>95\%$ ). 1 species within 1% deviation of top hit. Species-level confidence.              | Lobostemon fruticosus      |
| Kh114  | ITS    | 99       | 1           | High identity ( $>95\%$ ). 1 species within 1% deviation of top hit. Species-level confidence.              | Alcea koelzii              |
| Kh115  | ITS    | 93       | 1           | Medium identity ( $90\% \leq i < 95\%$ ). 1 species within 1% deviation of top hit. Genus-level confidence. | Bunium sp.                 |
| Kh115  | trnL-F | 97       | 2           | High identity ( $>95\%$ ). 2 species within 1% deviation of top hit. Family-level confidence                | Apiaceae                   |
| Kh116  | ITS    | 100      | 2           | High identity ( $>95\%$ ). 2 species within 1% deviation of top hit. Genus-level confidence.                | Berberis sp.               |
| Kh116  | trnL-F | 98       | 3           | High identity ( $>95\%$ ). 3 species within 1% deviation of top hit. Genus-level confidence.                | Berberis sp.               |
| Kh117  | ITS    | 100      | 3           | High identity ( $>95\%$ ). 1 species within 1% deviation of top hit. Species-level confidence.              | Urtica dioica              |
| Kh117  | trnL-F | 100      | 1           | High identity ( $>95\%$ ). 1 species within 1% deviation of top hit. Species-level confidence.              | Urtica dioica              |
| Kh118  | ITS    | 99       | 1           | High identity ( $>95\%$ ). 1 species within 1% deviation of top hit. Species-level confidence.              | Astragalus commixtus       |
| Kh118  | trnL-F | 97       | 4           | High identity ( $>95\%$ ). 4 species within 1% deviation of top hit. Genus-level confidence.                | Astragalus sp.             |
| Kh132  | ITS    | 100      | 2           | High identity ( $>95\%$ ). 2 species within 1% deviation of top hit. Genus-level confidence.                | Astragalus sp.             |
| Kh132  | trnL-F | 100      | 2           | High identity ( $>95\%$ ). 1 species within 1% deviation of top hit. Species-level confidence.              | Astragalus edulis          |
| Kh133  | ITS    | 99       | 2           | High identity ( $>95\%$ ). 1 species within 1% deviation of top hit. Species-level confidence.              | Zatania multiflora         |
| Kh133  | trnL-F | 100      | 1           | High identity ( $>95\%$ ). 1 species within 1% deviation of top hit. Species-level confidence.              | Pentapleura subulifera     |
| Kh135  | trnL-F | 95       | 1           | High identity ( $>95\%$ ). 1 species within 1% deviation of top hit. Species-level confidence.              | Pentaplaris doroteae       |
| Kh138  | ITS    | 93       | 1           | Medium identity ( $90\% \leq i < 95\%$ ). 1 species within 1% deviation of top hit. Genus-level confidence. | Bunium sp.                 |
| Kh138  | trnL-F | 87       | 1           | Low identity ( $< 90\%$ ). 1 species within 1% deviation of top hit. Family-level confidence                | Apiaceae                   |
| Kh141  | ITS    | 90       | 1           | Medium identity ( $90\% \leq i < 95\%$ ). 1 species within 1% deviation of top hit. Genus-level confidence. | Pimpinella sp.             |
| Kh141  | trnL-F | 90       | 1           | Medium identity ( $90\% \leq i < 95\%$ ). 1 species within 1% deviation of top hit. Genus-level confidence. | Heteromorpha sp.           |
